# Supplementary material for: Characterization of firearm discharge residues recovered from skin swabs using sub-micrometric mass spectrometry imaging
Source: Royal Society of Chemistry journal article supplement (doi:10.1039/c6ay00096g), 2016-01-01

## Characterization of Firearms Discharge Residue Recovered from Skin Swabs using Sub-micrometric Mass Spectrometry Imaging

Anthony Castellanos<sup>1</sup>, Suzanne Bell<sup>2</sup>, and Francisco Fernandez-Lima<sup>1,3\*</sup>

<sup>1</sup> Department of Chemistry and Biochemistry, Florida International University, Miami, FL 33199

<sup>2</sup> C. Eugene Bennett Department of Chemistry and the Department Forensic and Investigative Sciences, West Virginia University, 1600 University Avenue, Oglebay Hall Room 208, Morgantown, WV 26506

<sup>3</sup> Biomolecular Science Institute, Florida International University, Miami, FL 33199

### Supporting Information

#### Table of contents:

Figure S1. Typical negative HCBU spectral mode of the GSR (15x10µm). Notice the observations of the Si<sup>-</sup>, Pb<sup>-</sup>, SbC<sup>-</sup>, and SbO<sub>n</sub><sup>-</sup> series. Bismuth is observed due to backscattering of the primary ion beam.

Figure S1. Typical negative HCBU spectral mode of the GSR (15x10 $\mu$ m). Notice the observations of the Si<sup>-</sup>, Pb<sup>-</sup>, PbOH<sup>-</sup>, SbC<sup>-</sup>, and SbO<sub>n</sub><sup>-</sup> series. Bismuth is observed due to backscattering of the primary ion beam.

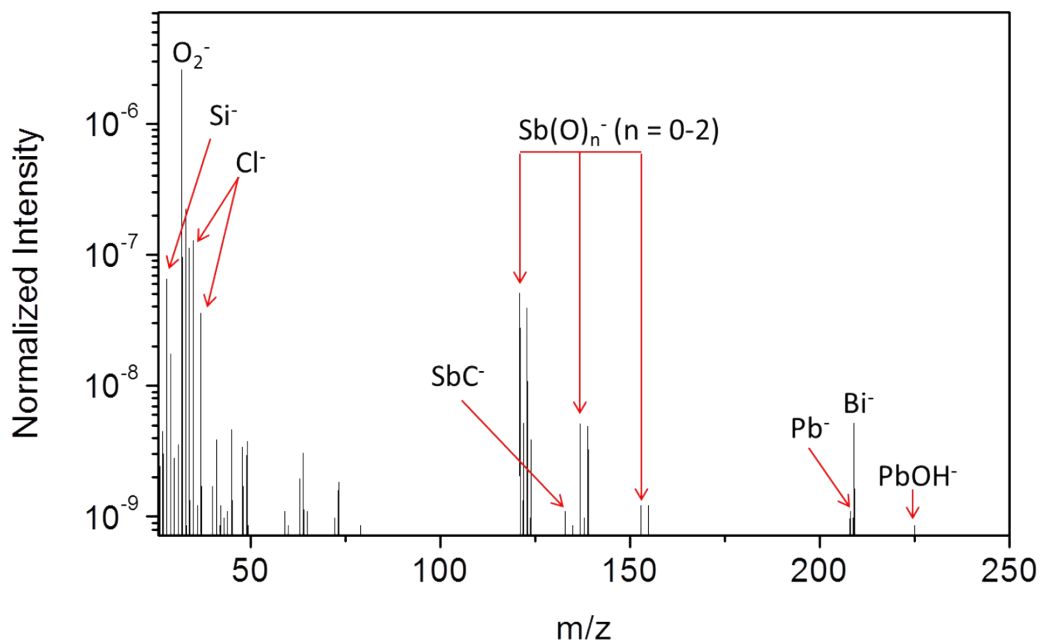

Supplement: c6ay00096g1.pdf [file c6ay00096g1.pdf]
